# Supplementary material for: Identification of Putative Precursor Genes for the Biosynthesis of Cannabinoid-Like Compound in Radula marginata
Source: PubMed Central journal article supplement (PMC5954354; doi:10.3389/fpls.2018.00537), 2018-05-09

**A**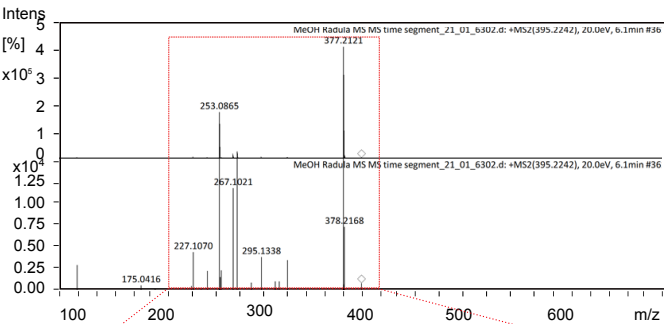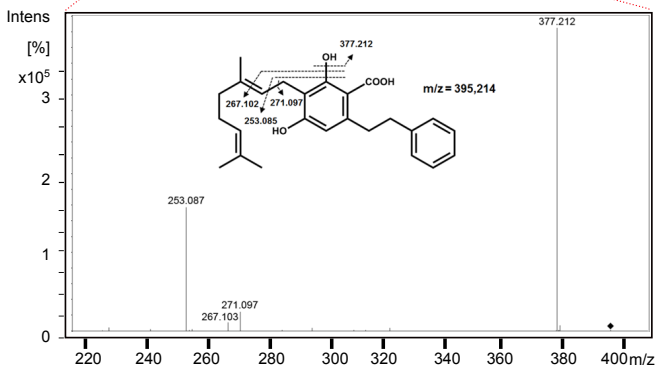**B**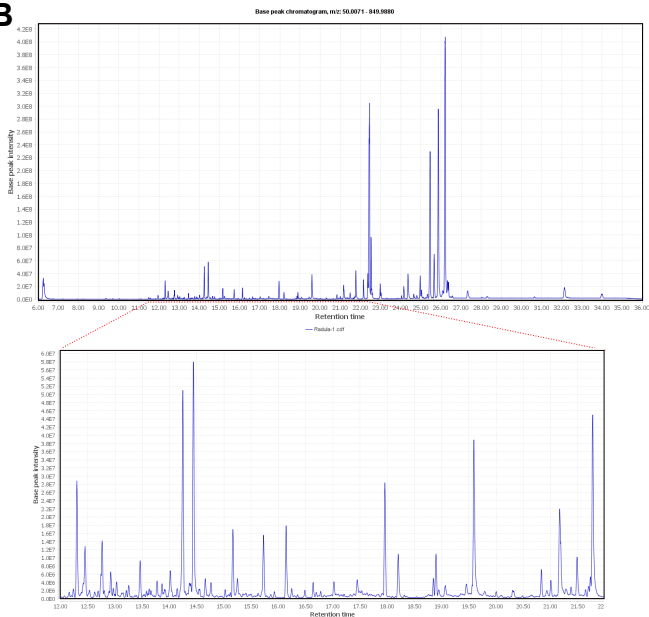

Supplement: Image_2.pdf [file Image_2.pdf]
